# Supplementary material for: Assessment of the Safety and Probiotic Properties of Enterococcus faecium B13 Isolated from Fermented Chili
Source: MDPI journal article supplement (doi:10.3390/microorganisms12050994), 2024-05-15
Supplement: s1 [file s1]

**Table S4.  $\alpha$ -diversity indices.**

| Sample         | ace    | chao   | shannon  | simpson  |
|----------------|--------|--------|----------|----------|
| B13            | 6391   | 6391   | 4.66828  | 0.034888 |
| B13            | 5414   | 5414   | 4.558616 | 0.034936 |
| B13            | 4104   | 4104   | 4.209894 | 0.060936 |
| B13            | 5766   | 5766   | 4.479442 | 0.039732 |
| B13            | 6331   | 6331   | 4.717356 | 0.034583 |
| control        | 5716   | 5716   | 4.45398  | 0.036956 |
| control        | 6244   | 6244   | 4.672001 | 0.035904 |
| control        | 5934   | 5934   | 4.957037 | 0.027389 |
| control        | 6552   | 6552   | 4.743967 | 0.032819 |
| control        | 5118   | 5118   | 4.628274 | 0.034009 |
| <i>P</i> value | 0.8345 | 0.8345 | 0.5925   | 0.5925   |
