# Supplementary material for: Assessment of the Safety and Probiotic Properties of Enterococcus faecium B13 Isolated from Fermented Chili
Source: MDPI journal article supplement (doi:10.3390/microorganisms12050994), 2024-05-15
Supplement: s1 [file s1]

**Table S3. Effects of *E. faecium* B13 on Organ Indexes in mice (100%).**

| Content | Control group | B13 group | <i>P</i> value |
|---------|---------------|-----------|----------------|
| heart   | 0.57±0.1      | 0.53±0.1  | 0.399          |
| liver   | 4.55±0.45     | 4.29±0.41 | 0.236          |
| spleen  | 0.37±0.22     | 0.28±0.11 | 0.298          |
| lungs   | 0.9±0.36      | 0.77±0.26 | 0.412          |
| kidney  | 1.41±0.13     | 1.33±0.22 | 0.406          |
