# Supplementary material for: Assessment of the Safety and Probiotic Properties of Enterococcus faecium B13 Isolated from Fermented Chili
Source: MDPI journal article supplement (doi:10.3390/microorganisms12050994), 2024-05-15
Supplement: s1 [file s1]

**Table S2. Effect of *E. faecium* B13 on blood routine in mice.**

| blood indices                         | Control             | B13                 | Reference range | <i>P</i> -value |
|---------------------------------------|---------------------|---------------------|-----------------|-----------------|
| White Blood Cell ( $\times 10^9/L$ )  | 2.13 $\pm$ 1.15     | 1.7 $\pm$ 0.46      | 0.80-6.80       | 0.428           |
| Lymphocyte ( $\times 10^9/L$ )        | 1.62 $\pm$ 1.36     | 1.24 $\pm$ 0.52     | 0.70-5.70       | 0.553           |
| Monocyte ( $\times 10^9/L$ )          | 0.15 $\pm$ 0.06     | 0.1 $\pm$ 0.00      | 0.00-0.30       | 0.182           |
| Neutrophil ( $\times 10^9/L$ )        | 0.42 $\pm$ 0.31     | 0.42 $\pm$ 0.23     | 0.10-1.80       | 0.984           |
| Red Blood Cell ( $\times 10^{12}/L$ ) | 8.49 $\pm$ 0.39     | 8.49 $\pm$ 0.40     | 6.36-9.42       | 0.989           |
| Hemoglobin (g/L)                      | 173.67 $\pm$ 6.92   | 171.40 $\pm$ 8.17   | 110.00-143.00   | 0.630           |
| Blood Platelet ( $\times 10^9/L$ )    | 972.00 $\pm$ 222.99 | 794.40 $\pm$ 486.74 | 450-1590        | 0.442           |
